**Deep sequencing analysis of the circadian transcriptome of the jewel wasp  
*Nasonia vitripennis***

Nathaniel J. Davies and Eran Tauber<sup>†</sup>

Dept. of Genetics, University of Leicester, University Road, Leicester LE1 7RH, UK

Running title: Sequencing the *Nasonia* circadian transcriptome

<sup>†</sup> For correspondence. Dept. Genetics, University of Leicester, University Road, Leicester LE1 7RH, United Kingdom. Email: [et22@le.ac.uk](mailto:et22@le.ac.uk)

Tel: +44-116- 252- 3455; Fax; +44 116 252 378

## 2 **Abstract**

3 The study of the circadian clock has benefited greatly from using *Drosophila* as a  
4 model system. Yet, accumulating evidence suggests that the fly might not be the  
5 canonical insect model. Here, we have analysed the circadian transcriptome of  
6 the Jewel wasp *Nasonia vitripennis* by using RNA-seq in both constant darkness  
7 (DD) and constant light (LL, the wasps are rhythmic in LL with period  
8 shortening). At a relatively stringent FDR ( $q < 0.1$ ), we identified 1,057 cycling  
9 transcripts in DD and 929 in LL (fraction of 6.7% and 5.9% of all transcripts  
10 analysed in DD and LL respectively). Although there was little similarity between  
11 cycling genes in *Drosophila* and *Nasonia*, the functions fulfilled by cycling  
12 transcripts were similar in both species. Of the known *Drosophila* core clock  
13 genes, only *pdp1e*, *shaggy* and *Clok* showed a significant cycling in *Nasonia*,  
14 underscoring the importance of studying the clock in non-model organisms.  
15

## 16 **Introduction**

17 The circadian clock regulates fundamental biological processes such as sleep  
18 (Huang, *et al.* 2011), metabolism (Huang, *et al.* 2011), and the immune system  
19 (Scheiermann, *et al.* 2013), and has implications for a wide range of human  
20 diseases. Notable examples of diseases linked to the circadian clock include  
21 cancer (Kelleher, *et al.* 2014), Alzheimer's disease (Musiek, *et al.* 2015),  
22 cardiovascular disease (Takeda and Maemura, 2011), obesity (Maury, *et al.*  
23 2010), diabetes (Maury, *et al.* 2010), and depression (Quera Salva, *et al.* 2011). A  
24 primary output of the clock is circadian regulation of transcription, a trait which  
25 has been demonstrated in mammals (Hughes, *et al.* 2009), insects (McDonald

26 and Rosbash, 2001a), plants (Schaffer, *et al.* 2001), and even bacteria (Woelfle  
27 and Johnson, 2006). Therefore, analysing transcriptional oscillations in clock-  
28 controlled genes (CCGs) is a key step in understanding how the daily rhythms  
29 produced by the clock are ultimately linked to behavioural phenotypes.

30         The genetic mechanisms underlying the animal circadian clock were first  
31 elucidated through studies of model animals; primarily the fruit fly *Drosophila*.  
32 The first clock gene to be identified, *period (per)*, was discovered through  
33 mapping the genetic basis of *Drosophila* mutants with aberrant locomotor and  
34 eclosion rhythms (Konopka and Benzer, 1971). The discovery of *period* was  
35 followed by the discovery of its heterodimeric partner *timeless (tim)* (Sehgal, *et*  
36 *al.* 1994). These two genes are joined by a roster of other genes working together  
37 to produce robust internal rhythms.

38         The discoveries made in *Drosophila* have been instrumental for  
39 understanding the mechanisms of the circadian clock in mammals (Yu and  
40 Hardin, 2006). As the principal insect model, *Drosophila* has been used to great  
41 effect to model circadian phenomena in humans (Rosato, *et al.* 2006). However,  
42 as circadian research into non-drosophilid insects has advanced, several  
43 alternative clock models have been proposed (Yuan, *et al.* 2007), some of which  
44 may better model aspects of the mammalian clock than *Drosophila*.

45         For example, a major difference between the various clock models in  
46 insects concerns the light input pathway. The main light input to the clock in  
47 *Drosophila* is mediated through *cryptochrome (cry1)* which is activated in  
48 response to light (Ceriani, *et al.* 1999), binds to and promotes the degradation of  
49 *tim* (Busza, *et al.* 2004), ultimately resulting in the degradation of *per* (Ko, *et al.*  
50 2002, Grima, *et al.* 2002). In contrast, mammalian-like *cryptochrome (cry2)* is not

51 light-sensitive (Yuan, *et al.* 2007), but is a part of the core transcriptional  
52 feedback loop suppressing its own transcription (and that of *per*) by interfering  
53 with the actions of the CLK-BMAL1 heterodimer (Kume, *et al.* 1999, Jin, *et al.*  
54 1999). Mammals also lack a homolog for *timeless*, possessing only a homolog of  
55 the *Drosophila* gene *timeout* (Benna, *et al.* 2000), a gene whose potential role in  
56 the clock is less clear and less crucial than that of *timeless* (Gustafson and Partch,  
57 2015, Benna, *et al.* 2010).

58         The Lepidoptera harbour both types of *cryptochrome* (*Drosophila*-like  
59 *cry1* and mammal-like *cry2*) (Tomioka and Matsumoto, 2010), as well as  
60 homologs of *timeless* and *timeout* (Tomioka and Matsumoto, 2015). The two  
61 cryptochromes have been shown to act in a similar way to their *Drosophila* and  
62 mammal counterparts; *cry1* functions as a light receptor and *cry2* serves as a  
63 transcriptional repressor (Zhu, *et al.* 2008).

64         Of the major insect orders, the Hymenoptera arguably possess the most  
65 mammalian-like core clock architecture, possessing *cry2* and *timeout* but neither  
66 *cry1* nor *timeless* (Tomioka and Matsumoto, 2015, Yuan, *et al.* 2007). In addition  
67 to these molecular similarities, there is evidence that the transcriptional profiles  
68 of these genes match more closely the mammalian model than the *Drosophila*  
69 model (Rubin, *et al.* 2006). Light-entrained circadian rhythms have been  
70 demonstrated in the Hymenoptera, but the question of light detection in the  
71 Hymenopteran clock remains an open one.

72         *Nasonia vitripennis* is a parasitoid wasp, which as a research model offers  
73 advantages over other hymenopterans, including a fully sequenced genome  
74 (Werren, *et al.* 2010), systemic RNAi (Lynch and Desplan, 2006), a robust and  
75 well-characterised circadian response (Bertossa, *et al.* 2013), a fully functional

76 DNA methylation kit (Park, *et al.* 2011), and a history as a model for  
77 photoperiodism (Saunders, 1969).

78 In this study, we advance *Nasonia* as an alternative circadian model by  
79 using RNA-seq to profile whole-transcriptome gene expression in the *Nasonia*  
80 head. As the *Nasonia* clock free-runs in both constant darkness and constant light  
81 (Figure 1), we profiled both of these conditions to examine how the two  
82 circadian transcriptomes differ. To our knowledge, this is the first circadian  
83 RNA-seq study performed in an insect other than *Drosophila*, and the first study  
84 to profile the circadian transcriptome oscillating under constant light.

## 85 **Results**

### 86 **Identifying rhythmic transcription**

87 We first performed an unbiased clustering analysis to ascertain the kinds of  
88 expression patterns present in the data. To this end, Mfuzz (Kumar and E  
89 Futschik, 2007) was used to carry soft c-means clustering, a method which is less  
90 sensitive to biological noise than traditional clustering (Futschik and Carlisle,  
91 2005). After filtering (see Methods), thirty clusters were generated for each  
92 condition (Supplementary figures S1 and S2), revealing a variety of potentially  
93 rhythmic and non-rhythmic expression trends. Potential asymmetric wave forms  
94 were detected in LL (e.g. Supplementary figure S2, clusters 22 and 26).

95 To identify rhythmic transcripts, we used the RAIN algorithm (Thaben  
96 and Westermark, 2014). At false discovery rate (FDR) threshold of 0.1 we  
97 identified 1,057 rhythmic transcripts in DD and 929 in LL (Table S1, S2).

98 Rhythmic transcripts ( $q < 0.1$ ) were sorted by phase, peak shape, and  
99 significance, and plotted (Figure 2A). Examining the phase distribution (Figure

100 2B), it is apparent that the majority of transcripts show peak expression early in  
101 the subjective morning/afternoon or in the subjective night, with fewer  
102 transcripts peaking at intermediate times. This disparity in phase is greater in  
103 the transcripts which show rhythmic expression in both DD and LL; less than  
104 12% of transcripts in DD and less than 5% in LL show peak expression at  
105 intermediate times (Figure 2B). The majority of these transcripts (~87%) exhibit  
106 a similar (+-4 hrs) phase in LL to their phase in DD.

107 Similarly to *Drosophila* (Hughes, *et al.* 2012) and mammals (Hughes, *et al.*  
108 2009), the majority of transcripts show only small cyclic changes in expression  
109 amplitude over the day; over 80% of reliably quantified (see Methods)  
110 transcripts in both conditions have amplitudes (peak expression divided by  
111 trough expression) of 2 or less. In both DD and LL, transcripts with exceptionally  
112 high amplitudes (> 4) are transcripts with unusually low or high measurements  
113 at isolated time-points with no obvious specific shared function. This is in  
114 contrast with results in *Drosophila* and mammals, where some core clock genes  
115 exhibit very high amplitude oscillations (Hughes, *et al.* 2009, Hughes, *et al.*  
116 2012, Li, *et al.* 2015).

117

### 118 **Canonical clock genes and comparison with *Drosophila***

119 The canonical clock genes were examined for rhythmicity both at the transcript  
120 level and via an additional RAIN analysis at the gene level. The q-values (FDR  
121 adjusted p-values) for the canonical clock genes are shown in supplementary  
122 table S3. We found a rather limited evidence for rhythmicity in these genes  
123 which included *pdp1e* (q ~ 0.1, LL and DD), *shaggy* (q < 0.1, DD), and *Clk* (q ~ 0.1,

124 LL). At a less stringent FDR ( $1 < 0.2$ ), *per*, *cyc*, *Dbt* and *cwo* were rhythmic in DD,  
125 while *cry* and *cyc*, were oscillating in LL.

126

127 The most strongly associated cluster for the primary transcript (most highly  
128 expressed) of each gene is also shown in supplementary table S3, providing  
129 evidence that some clock genes are associated with clusters with rhythmic  
130 trends. For comparison between splice variants and conditions, median  
131 expression levels of the canonical clock genes and their transcripts for both DD  
132 and LL are shown in supplementary table S4.

133 We compared the transcripts identified as cycling in *Nasonia* heads with  
134 the transcripts identified as cycling in *Drosophila* heads. For these purposes, we  
135 used a list of genes identified in a meta-analysis study of *Drosophila* circadian  
136 microarray data as being rhythmically expressed in either LD or DD (Keegan, *et*  
137 *al.* 2007). Of 173 genes identified as rhythmic in *Drosophila*, 33 genes  
138 (Supplementary table S5) were found to also be rhythmic in *Nasonia* (either in  
139 LL or DD,  $q < 0.1$ ), no more than would be expected by chance ( $p = 0.11$ ,  
140 hypergeometric test).

141

## 142 **Functions of rhythmic genes**

143 To capture the general functions that rhythmic genes may fulfil in *Nasonia*, we  
144 tested a broader set of rhythmic genes ( $< 0.2$  FDR in RAIN) for GO term  
145 overrepresentation (Davies and Tauber, 2015a), revealing 94 GO terms  
146 overrepresented for genes rhythmic in DD (including 'response to light stimulus',  
147 'proteasome complex', and 'generation of neurons', Supplementary table S6) and  
148 123 terms for genes rhythmic in LL (including 'locomotion', 'proteasome

149 complex', and 'response to external stimulus', Supplementary table S7), 25 of  
150 which were shared between both conditions (Figure 3). Shared terms include  
151 terms related to neurons, signal transmission, and responses to stimuli. Notably,  
152 all four *Nasonia* opsins were found to exhibit similar transcriptional profiles in  
153 LL and DD, with low expression in the morning and high expression in the  
154 evening.

155 It has previously been demonstrated that the timing of different (or indeed  
156 opposing) biological processes can be controlled through the circadian  
157 regulation of groups of genes (Sancar, *et al.* 2015,Zhang, *et al.* 2014).

158 Unsupervised clustering methods have previously been established as a useful  
159 method for functional characterisation of circadian genes (Nguyen, *et al.* 2014).

160 To establish whether temporal separation of functions occurs in *Nasonia*, we  
161 therefore returned to the expression clustering analysis. Firstly, we employed  
162 hypergeometric tests to identify clusters with an overrepresentation of rhythmic  
163 genes (Figure 4, Supplementary table S8 and S9). Clusters which were found to  
164 have a significant rhythmic component ( $q < 0.05$ , supplementary tables S8 and  
165 S9) were analysed for overrepresented GO terms. Examples of clusters with  
166 enriched functions include clusters DD7 and LL20 which are significantly  
167 enriched for catalytic activity GO terms, especially genes involved in the  
168 proteasome, and clusters DD24 and LL6 which are both involved in circadian  
169 and neural processes. Other clusters (DD1 and DD2) did not turn up any  
170 overrepresented GO terms and are thus likely comprised of genes with a wide  
171 range of functions.

172



173 **Transcriptional differences between constant darkness and constant light**

174 To examine whether differences in circadian period seen in locomotor activity  
175 between DD and LL could also be detected in transcriptional rhythms, we fitted  
176 parametric models with a range of periods to transcripts rhythmic in both  
177 conditions ( $q < 0.1$ ). For those transcripts with statistically significant fits to the  
178 model in both conditions ( $q < 0.1$ , see Methods), we took the period with the best  
179 fit and compared these periods between conditions. Overall, transcripts in LL  
180 showed a significantly ( $p < 3.9e-09$ , Wilcoxon rank sum test) shorter (median  
181 24) period than those in DD (median 25.4), mirroring the behavioural  
182 differences in period.

183 We have also tested for differential expression between DD and LL. In the  
184 absence of biological replicates, we analysed differential expression using a fold-  
185 change approach. We used 1.5 fold change as a cut-off for differential expression  
186 (Dalman, *et al.* 2012), yielding 1,488 genes expressed higher in DD than LL and  
187 971 genes expressed higher in LL than DD (Figure 5). Genes more highly  
188 expressed in DD were significantly enriched ( $q < 0.01$ ) for genes involved in  
189 various forms of catalytic activity (Supplementary table S10), including the vast  
190 majority of proteasome genes (>75%). Genes more highly expressed in LL were  
191 enriched for a small number of terms including 'plasmalemma' and 'sequence-  
192 specific DNA binding' (Supplementary table S11).

193 **Discussion**

194 This study provides the first insights into global transcriptional oscillation in  
195 *Nasonia*. With RNA-seq, we profiled the circadian transcription of >26,000  
196 transcripts in *Nasonia* in either DD or LL. At a relatively stringent FDR ( $q < 0.1$ ),

197 we identified 1,057 cycling transcripts in DD and 929 cycling transcripts in LL.  
198 These transcripts correspond to a cycling fraction of 6.7% and 5.9% of all  
199 transcripts analysed in DD and LL respectively. These figures are comparable to  
200 cycling fractions reported in various organisms and tissues, generally between  
201 2% and 10% of the transcriptome (Michael and McClung, 2003).

202 In both conditions, cycling transcripts were found to cycle at low  
203 amplitudes (mostly < 2 fold) and with a limited, bimodal, range of phases. This is  
204 in contrast to microarray/RNA-seq studies in *Drosophila*, where transcripts were  
205 found to cycle with a broader range of phases (Rodriguez, *et al.* 2013) and  
206 studies in both mammals and *Drosophila*, which have identified a group of high-  
207 amplitude (> 4-fold) cycling genes among the low-amplitude majority (Akhtar, *et*  
208 *al.* 2002). High amplitude cyclers typically include clock genes (Akhtar, *et al.*  
209 2002, Hughes, *et al.* 2012). The low oscillations of the *Nasonia* head  
210 transcriptome render the expression profiles of the canonical clock genes  
211 difficult to resolve (Covington, *et al.* 2008). This issue may also contribute to the  
212 discordance between the various circadian microarray studies in *Drosophila*  
213 (Keegan, *et al.* 2007).

214 An emerging property of the circadian transcriptome in *Nasonia* is the  
215 temporal separation of function by phase (Fig 2). Notably, genes involved in  
216 catalytic activity were strongly overrepresented in morning-peaking transcripts.  
217 This is in line with other studies which show catalytic activity confined to the  
218 morning in fungi (Sancar, *et al.* 2015), in agreement with a general observation  
219 that an important (or even primary) function of circadian clocks (Hurley, *et al.*  
220 2015) is to temporally separate catabolism and anabolism. Although we did not  
221 detect an overrepresentation of anabolic genes within the cyclic transcripts,

222 expression clusters DD10 and LL24 (Supplementary figures S1 and S2) did show  
223 strong overrepresentation (Supplementary tables S12 and S13) for genes  
224 involved in cytosolic ribosomal genes ( $q < 3.e-56$ ) and cellular anabolism ( $q < 2e-$   
225 06). These clusters exhibit an antagonistic expression pattern to the expression  
226 clusters containing the catabolic genes, suggesting that catabolism and  
227 anabolism are indeed separated by the circadian clock in *Nasonia*.

228         The comparison of expression between LL and DD reveals that a majority  
229 of genes involved in the proteasome and a broader set of genes involved in  
230 catabolism, are more highly expressed in DD than LL. As turnover rates of clock  
231 proteins have shown to be coupled with changes in the circadian period (Syed, *et*  
232 *al.* 2011, He and Liu, 2005), up-regulation of the proteasome may provide an  
233 explanation for differences in period observed between DD and LL.

234         Although the similarity of genes which cycle in *Drosophila* and *Nasonia* is  
235 rather low, the functions fulfilled by CCGs in *Nasonia* are similar to the functions  
236 filled by CCGs in *Drosophila*. Examples of functions shared by CCGs in the  
237 *Drosophila* and *Nasonia* heads are: various aspects of metabolism (Rodriguez, *et*  
238 *al.* 2013, Ueda, *et al.* 2002, Ceriani, *et al.* 2002, Claridge-Chang, *et al.* 2001),  
239 phototransduction (Ueda, *et al.* 2002, Rodriguez, *et al.* 2013), synaptic/nervous  
240 functions (McDonald and Rosbash, 2001b, Ceriani, *et al.* 2002, Claridge-Chang, *et*  
241 *al.* 2001), oxidoreductase activity (Claridge-Chang, *et al.* 2001), mating behaviour  
242 (Rodriguez, *et al.* 2013), and immunity (McDonald and Rosbash, 2001b, Ceriani,  
243 *et al.* 2002).

244         We identified cycling of genes involved in response to light, particularly  
245 all four *Nasonia* opsins. These opsins, along with associated gPCRs, cycle with a  
246 similar phase and are all more highly expressed in LL than in DD (Supplementary

247 figure S6). Daily and circadian changes in opsin expression have been  
248 demonstrated in other organisms (e.g. mice (Bowes, *et al.* 1988) , zebrafish (Li, *et*  
249 *al.* 2005), honeybee (Sasagawa, *et al.* 2003)), and opsin expression is generally  
250 found to be up-regulated in response to light (Yan, *et al.* 2014). Characterising  
251 the opsins in *Nasonia* is likely to provide insights into the light input pathway  
252 into the clock, particularly as *Nasonia* does not possess other obvious light input  
253 candidate genes such as *Drosophila*-like *CRY1* (Bertossa, *et al.* 2014) or *Pteropsin*  
254 (Velarde, *et al.* 2005) (Supplementary figure S6).

### 255 **Data availability**

256 We have made the expression profile for each transcript in both conditions  
257 available on WaspAtlas (Davies and Tauber, 2015b). Data have been archived in  
258 the NCBI short read archive (SRA), with accession number(s) [].

### 259 **Methods**

#### 260 **Maintenance and sample collection**

261 Stocks of *Nasonia vitripennis* (strain AsymCX) were maintained at 25°C on  
262 blowfly pupal hosts in 12:12 light:dark cycles. To obtain male wasps for  
263 experiments, groups of eight females were isolated at the yellow pupal stage and  
264 transferred onto fresh hosts upon eclosion. The resulting male progeny were  
265 collected upon eclosion and moved onto vials with a 30% sucrose agar medium,  
266 in groups of 20. During entrainment (four full days in an LD 12:12 cycle) and  
267 collection, wasps were kept in four light boxes in the same incubator at 19°C.  
268 Starting at CT1, wasps were collected every four hours and snap-frozen in liquid  
269 nitrogen and immediately transferred to -80°C. Wasps were collected  
270 sequentially from light box to light box every four hours to minimise disturbance

271 of wasps, and so that wasps were collected from each light box once every 16  
272 hours, thereby minimising the effect of variations within light boxes.  
273 Temperature and light recordings were taken during the experiment, and can be  
274 viewed in Supplementary file S2. To verify that wasps entrained correctly to the  
275 experimental conditions and that free-running behaviour was as expected,  
276 individual male wasps were isolated and locomotor activity was monitored.  
277 Behavioural recordings of individual male wasps in experimental conditions can  
278 be seen in Supplementary figure S7, ruling out behavioural differences caused by  
279 inter light box variations in light intensity in LL, though not transcriptional  
280 differences.

281

## 282 **RNA extraction, sequencing, and read mapping**

283 RNA was extracted from pooled groups of 50 heads for each sample, using Trizol  
284 RNA extraction protocol, and followed by clean-up using the RNAeasy spin  
285 column kit (Qiagen). Samples were polyA selected and sequenced at Glasgow  
286 Polyomics (University of Glasgow, United Kingdom) on the Illumina NextSeq500  
287 platform, resulting in approximately 20 million 75bp paired-end reads per  
288 sample.

289 Read mapping was achieved with Tophat2 (v2.1.0) (Trapnell, *et al.* 2012)  
290 against the *Nasonia* Nvit\_2.1 NCBI annotation. As the purpose of this study was  
291 not to identify novel splice variants or improve on existing annotation, novel  
292 junction detection was disabled for accurate quantification of known transcripts.  
293 Mean mapping efficiency was above 90% for both conditions (Supplementary  
294 table S14). Read quantification was performing using the DEseq normalisation

295 method (Anders and Huber, 2010). All 24 samples from both conditions were  
296 grouped together to allow comparison between as well as within conditions.

297

### 298 **Expression profile clustering**

299 Isoform expression profiles were first filtered to include only those isoforms  
300 with no missing values at any time-point in either condition. Expression values  
301 were standardised using the 'Standardise' function in Mfuzz (Kumar and E  
302 Futschik, 2007). The 'cselection' function in Mfuzz was used to select an  
303 appropriate c-value for the c-means clustering (default parameters;  $m=1.25$ ).  
304 Based on this analysis, thirty fuzzy clusters were generated for each condition  
305 using the fuzzification parameter  $m=1.25$ .

306

### 307 **Rhythmic expression analysis**

308 RAIN (Thaben and Westermarck, 2014) was used on all filtered isoforms (i.e.  
309 those with no missing values at any timepoint) in either condition to detect  
310 rhythmic isoforms at a period of 24 hours. As a non-parametric method, RAIN  
311 only facilitates detection of rhythmic isoforms with periods which are a multiple  
312 of the sample resolution (in this case 4 hr). The p-values produced by RAIN were  
313 corrected to q-values using the Benjamini-Hochberg method (Benjamini and  
314 Hochberg, 1995). This method was repeated using expression values for genes  
315 rather than transcripts for the clock gene analysis (i.e. the summed expression  
316 values for all known transcripts of a particular gene).

317 Maximum fold changes in expression were calculated by normalising per-  
318 condition expression values by the median value and calculating the ratio from  
319 the lowest expression over 48 hours to the highest. Reliably quantified

320 transcripts are defined as those those transcripts where the absolute FPKM  
321 value is 5 or above at all timepoints, the threshold for this set at a similar level to  
322 other analyses (Hughes, *et al.* 2012).

323 To analyse the period of rhythmic transcripts, we fitted parametric  
324 waveforms with a variety of periods (20 to 28 hrs in steps of 0.2 hrs) to all  
325 transcripts identified as rhythmic ( $q < 0.1$ ) in both conditions. This FDR  
326 threshold is in line with, or more strict, than thresholds chosen in other similar  
327 studies (Hughes, *et al.* 2012, Huang, *et al.* 2013, Keegan, *et al.* 2007). Those  
328 transcripts (85 in total) which showed a significant ( $q < 0.1$ ) fit to the model in  
329 both conditions were analysed in terms of their best fitting period.

330 GO term overrepresentation was performed in WaspAtlas (Davies and  
331 Tauber, 2015b) using the Nvit\_2.1 NCBI annotation dataset. All hypergeometric  
332 tests were performed within R using the 'phyper' function. Clusters with  
333 rhythmic components were identified by collapsing the fuzzy clusters into hard  
334 clusters using the 'cluster' property of the Mfuzz object, performing  
335 hypergeometric tests to identify clusters with enrichment for rhythmic  
336 transcripts. Thirty tests were performed for each condition (i.e. for all clusters),  
337 and were corrected per-condition using the Benjamini-Hochberg method in R (R  
338 Development Core Team, 2008).

339 For comparison to microarray studies, orthologs for *Drosophila*  
340 *melanogaster* were obtained from a meta-study of circadian microarray data  
341 (Keegan, *et al.* 2007). The 214 obtained FlyBase identifiers were converted to the  
342 latest identifiers using the validation tool, resulting in 218 unique identifiers (the  
343 increase in identifiers can be attributed to previous identifiers referring to  
344 multiple genes in the current annotation). Orthologs for these *Drosophila* genes

345 were obtained through WaspAtlas, retrieving orthologs for 135 genes which  
346 mapped to 173 unique *Nasonia* genes due to gene duplications, etc. This set of  
347 173 genes was compared with the number of genes with rhythmic transcripts  
348 that would be expected by chance using a hypergeometric test.

349

### 350 **Phylogenetic analysis of opsin genes**

351 Opsin genes were searched for using NCBI BLASTP using six species; *Apis*  
352 *mellifera*, *Bombyx mori*, *Drosophila melanogaster*, *Mus musculus*, *Nasonia*  
353 *vitripennis*, and *Homo sapiens*, using the *Nasonia Lop1* protein sequence as a  
354 query. BLAST results were inspected and  $7e-19$  was chosen as an appropriate  
355 cut-off to include all opsin sequences. Sequences were aligned by ClustalW in  
356 MEGA (Tamura, *et al.* 2007) and a maximum likelihood tree generated using  
357 default parameters. Duplicated sequences were manually removed, and  
358 sequences renamed for display on the tree. Full protein name to shortened  
359 display name translations can be found in supplementary table S15.

360

### 361 **References**

362 Akhtar RA, Reddy AB, Maywood ES, Clayton JD, King VM, Smith AG, Gant TW,  
363 Hastings MH, Kyriacou CP. 2002. Circadian cycling of the mouse liver  
364 transcriptome, as revealed by cDNA microarray, is driven by the  
365 Suprachiasmatic Nucleus. *Current Biology*, **12**: 540-550.

366 Anders S and Huber W. 2010. Differential expression analysis for sequence count  
367 data. *Genome Biol.* **11**: R106-2010-11-10-r106. Epub 2010 Oct 27.



- 368 Benjamini Y and Hochberg Y. 1995. Controlling the False Discovery Rate: A  
369 Practical and Powerful Approach to Multiple Testing. *Journal of the Royal*  
370 *Statistical Society. Series B (Methodological)* **57**: 289-300.
- 371 Benna C, Bonaccorsi S, Wulbeck C, Helfrich-Forster C, Gatti M, Kyriacou CP, Costa  
372 R, Sandrelli F. 2010. *Drosophila timeless2* is required for chromosome stability  
373 and circadian photoreception. *Curr. Biol.* **20**: 346-352.
- 374 Benna C, Scannapieco P, Piccin A, Sandrelli F, Zordan M, Rosato E, Kyriacou CP,  
375 Valle G, Costa R. 2000. A second timeless gene in *Drosophila* shares greater  
376 sequence similarity with mammalian tim. *Curr. Biol.* **10**: R512-3.
- 377 Bertossa RC, van de Zande L, Beukeboom LW, Beersma DG. 2014. Phylogeny and  
378 oscillating expression of period and cryptochrome in short and long  
379 photoperiods suggest a conserved function in *Nasonia vitripennis*. *Chronobiol.*  
380 *Int.* **31**: 749-760.
- 381 Bertossa RC, van Dijk J, Diao W, Saunders D, Beukeboom LW, Beersma DG. 2013.  
382 Circadian rhythms differ between sexes and closely related species of *Nasonia*  
383 wasps. *PLoS One* **8**: e60167.
- 384 Bowes C, van Veen T, Farber DB. 1988. Opsin, G-protein and 48-kDa protein in  
385 normal and rd mouse retinas: developmental expression of mRNAs and proteins  
386 and light/dark cycling of mRNAs. *Exp. Eye Res.* **47**: 369-390.
- 387 Busza A, Emery-Le M, Rosbash M, Emery P. 2004. Roles of the two *Drosophila*  
388 CRYPTOCHROME structural domains in circadian photoreception. *Science* **304**:  
389 1503-6.

- 390 Ceriani MF, Darlington TK, Staknis D, Mas P, Petti AA, Weitz CJ, Kay SA. 1999.  
391 Light-dependent sequestration of TIMELESS by CRYPTOCHROME. *Science* **285**:  
392 553-6.
- 393 Ceriani MF, Hogenesch JB, Yanovsky M, Panda S, Straume M, Kay SA. 2002.  
394 Genome-Wide Expression Analysis in *Drosophila* Reveals Genes Controlling  
395 Circadian Behavior. *J. Neurosci.* **22**: 9305-9319.
- 396 Claridge-Chang A, Wijnen H, Naef F, Boothroyd C, Rajewsky N, Young MW. 2001.  
397 Circadian regulation of gene expression systems in the *Drosophila* head. *Neuron*  
398 **32**: 657-671.
- 399 Covington MF, Maloof JN, Straume M, Kay SA, Harmer SL. 2008. Global  
400 transcriptome analysis reveals circadian regulation of key pathways in plant  
401 growth and development. *Genome Biol.* **9**: R130.
- 402 Dalman MR, Deeter A, Nimishakavi G, Duan ZH. 2012. Fold change and p-value  
403 cutoffs significantly alter microarray interpretations. *BMC Bioinformatics* **13**  
404 **Suppl 2**: S11-2105-13-S2-S11.
- 405 Davies NJ and Tauber E. 2015a. WaspAtlas: a *Nasonia vitripennis* gene database  
406 and analysis platform. *Database (Oxford)* **2015**: bav103. Print 2015.
- 407 Davies NJ and Tauber E. 2015b. WaspAtlas: a *Nasonia vitripennis* gene database  
408 and analysis platform. *Database (Oxford)* **2015**: 10.1093/database/bav103. Print  
409 2015.

410 Futschik ME and Carlisle B. 2005. Noise-robust soft clustering of gene expression  
411 time-course data. *J. Bioinform Comput. Biol.* **3**: 965-988.

412 Grima B, Lamouroux A, Chelot E, Papin C, Limbourg-Bouchon B, Rouyer F. 2002.  
413 The F-box protein slimb controls the levels of clock proteins period and timeless.  
414 *Nature* **420**: 178-82.

415 Gustafson CL and Partch CL. 2015. Emerging models for the molecular basis of  
416 mammalian circadian timing. *Biochemistry* **54**: 134-149.

417 He Q and Liu Y. 2005. Degradation of the Neurospora circadian clock protein  
418 FREQUENCY through the ubiquitin-proteasome pathway. *Biochem. Soc. Trans.*  
419 **33**: 953-956.

420 Huang W, Ramsey KM, Marcheva B, Bass J. 2011. Circadian rhythms, sleep, and  
421 metabolism. *J. Clin. Invest.* **121**: 2133-2141.

422 Huang Y, Ainsley JA, Reijmers LG, Jackson FR. 2013. Translational profiling of  
423 clock cells reveals circadianly synchronized protein synthesis. *PLoS Biol.* **11**:  
424 e1001703.

425 Hughes ME, DiTacchio L, Hayes KR, Vollmers C, Pulivarthy S, Baggs JE, Panda S,  
426 Hogenesch JB. 2009. Harmonics of circadian gene transcription in mammals.  
427 *PLoS Genet.* **5**: e1000442.

428 Hughes ME, Grant GR, Paquin C, Qian J, Nitabach MN. 2012. Deep sequencing the  
429 circadian and diurnal transcriptome of Drosophila brain. *Genome Res.* **22**: 1266-  
430 1281.

- 431 Hurley JM, Loros JJ, Dunlap JC. 2015. The circadian system as an organizer of  
432 metabolism. *Fungal Genet. Biol.*
- 433 Jin X, Shearman LP, Weaver DR, Zylka MJ, de Vries GJ, Reppert SM. 1999. A  
434 molecular mechanism regulating rhythmic output from the suprachiasmatic  
435 circadian clock. *Cell* **96**: 57-68.
- 436 Keegan KP, Pradhan S, Wang JP, Allada R. 2007. Meta-analysis of *Drosophila*  
437 circadian microarray studies identifies a novel set of rhythmically expressed  
438 genes. *PLoS Comput. Biol.* **3**: e208.
- 439 Kelleher FC, Rao A, Maguire A. 2014. Circadian molecular clocks and cancer.  
440 *Cancer Lett.* **342**: 9-18.
- 441 Ko HW, Jiang J, Edery I. 2002. Role for Slimb in the degradation of *Drosophila*  
442 Period protein phosphorylated by Doubletime. *Nature* **420**: 673-678.
- 443 Konopka R and Benzer S. 1971. Clock mutants of *Drosophila melanogaster*. *Proc.*  
444 *Natl. Acad. Sci. USA* **68**: 2112-2116.
- 445 Kumar L and E Futschik M. 2007. Mfuzz: a software package for soft clustering of  
446 microarray data. *Bioinformatics* **2**: 5-7.
- 447 Kume K, Zylka MJ, Sriram S, Shearman LP, Weaver DR, Jin X, Maywood ES,  
448 Hastings MH, Reppert SM. 1999. mCRY1 and mCRY2 are essential components of  
449 the negative limb of the circadian clock feedback loop. *Cell* **98**: 193-205.

- 450 Li, J., Grant, G. R., Hogenesch, J. B., and Hughes, M. E. 2015. Chapter Sixteen -  
451 Considerations for RNA-seq Analysis of Circadian Rhythms. In *Methods in*  
452 *Enzymology* (ed. Amita Sehgal), pp. 349-367. Academic Press, .
- 453 Li P, Temple S, Gao Y, Haimberger TJ, Hawryshyn CW, Li L. 2005. Circadian  
454 rhythms of behavioral cone sensitivity and long wavelength opsin mRNA  
455 expression: a correlation study in zebrafish. *J. Exp. Biol.* **208**: 497-504.
- 456 Lynch JA and Desplan C. 2006. A method for parental RNA interference in the  
457 wasp *Nasonia vitripennis*. *Nat. Protoc.* **1**: 486-494.
- 458 Maury E, Ramsey KM, Bass J. 2010. Circadian Rhythms and Metabolic Syndrome:  
459 From Experimental Genetics to Human Disease. *Circulation Research* **106**: 447-  
460 462.
- 461 McDonald MJ and Rosbash M. 2001a. Microarray analysis and organization of  
462 circadian gene expression in *Drosophila*. *Cell* **107**: 567-578.
- 463 McDonald MJ and Rosbash M. 2001b. Microarray analysis and organization of  
464 circadian gene expression in *Drosophila*. *Cell* **107**: 567-578.
- 465 Michael TP and McClung CR. 2003. Enhancer trapping reveals widespread  
466 circadian clock transcriptional control in *Arabidopsis*. *Plant Physiol.* **132**: 629-  
467 639.
- 468 Musiek ES, Xiong DD, Holtzman DM. 2015. Sleep, circadian rhythms, and the  
469 pathogenesis of Alzheimer disease. *Exp. Mol. Med.* **47**: e148.

- 470 Nguyen TT, Mattick JS, Yang Q, Orman MA, Ierapetritou MG, Berthiaume F,  
471 Androulakis IP. 2014. Bioinformatics analysis of transcriptional regulation of  
472 circadian genes in rat liver. *BMC Bioinformatics* **15**: 83-2105-15-83.
- 473 Park J, Peng Z, Zeng J, Elango N, Park T, Wheeler D, Werren JH, Yi SV. 2011.  
474 Comparative analyses of DNA methylation and sequence evolution using  
475 *Nasonia* genomes. *Mol. Biol. Evol.* **28**: 3345-3354.
- 476 Quera Salva MA, Hartley S, Barbot F, Alvarez JC, Lofaso F, Guilleminault C. 2011.  
477 Circadian rhythms, melatonin and depression. *Curr. Pharm. Des.* **17**: 1459-1470.
- 478 R Development Core Team. 2008. *R: A Language and Environment for Statistical*  
479 *Computing*. R Foundation for Statistical Computing, Vienna, Austria.
- 480 Rodriguez J, Tang CH, Khodor YL, Vodala S, Menet JS, Rosbash M. 2013. Nascent-  
481 Seq analysis of *Drosophila* cycling gene expression. *Proc. Natl. Acad. Sci. U. S. A.*  
482 **110**: E275-84.
- 483 Rosato E, Tauber E, Kyriacou CP. 2006. Molecular genetics of the fruit-fly  
484 circadian clock. *Eur. J. Hum. Genet.* **14**: 729-38.
- 485 Rubin EB, Shemesh Y, Cohen M, Elgavish S, Robertson HM, Bloch G. 2006.  
486 Molecular and phylogenetic analyses reveal mammalian-like clockwork in the  
487 honey bee (*Apis mellifera*) and shed new light on the molecular evolution of the  
488 circadian clock. *Genome Res.* **16**: 1352-1365.

- 489 Sancar C, Sancar G, Ha N, Cesbron F, Brunner M. 2015. Dawn- and dusk-phased  
490 circadian transcription rhythms coordinate anabolic and catabolic functions in  
491 *Neurospora*. *BMC Biol.* **13**: 17-015-0126-4.
- 492 Sasagawa H, Narita R, Kitagawa Y, Kadowaki T. 2003. The expression of genes  
493 encoding visual components is regulated by a circadian clock, light environment  
494 and age in the honeybee (*Apis mellifera*). *Eur. J. Neurosci.* **17**: 963-970.
- 495 Saunders DS. 1969. Diapause and photoperiodism in the parasitic wasp *Nasonia*  
496 *vitripennis*, with special reference to the nature of the photoperiodic clock. *Symp.*  
497 *Soc. Exp. Biol.* **23**: 301-29.
- 498 Schaffer R, Landgraf J, Accerbi M, Simon V, Larson M, Wisman E. 2001.  
499 Microarray analysis of diurnal and circadian-regulated genes in *Arabidopsis*.  
500 *Plant Cell* **13**: 113-123.
- 501 Scheiermann C, Kunisaki Y, Frenette PS. 2013. Circadian control of the immune  
502 system. *Nat. Rev. Immunol.* **13**: 190-198.
- 503 Sehgal A, Price J, Man B, Young M. 1994. Loss of circadian behavioral rhythms  
504 and per RNA oscillations in the *Drosophila* mutant *timeless*. *Science* **263**: 1603-  
505 1606.
- 506 Syed S, Saez L, Young MW. 2011. Kinetics of doubletime kinase-dependent  
507 degradation of the *Drosophila* period protein. *J. Biol. Chem.* **286**: 27654-27662.
- 508 Takeda N and Maemura K. 2011. Circadian clock and cardiovascular disease. *J.*  
509 *Cardiol.* **57**: 249-256.

- 510 Tamura K, Dudley J, Nei M, Kumar S. 2007. MEGA4: Molecular Evolutionary  
511 Genetics Analysis (MEGA) software version 4.0. *Mol. Biol. Evol.* **24**: 1596-1599.
- 512 Thaben PF and Westermarck PO. 2014. Detecting rhythms in time series with  
513 RAIN. *J. Biol. Rhythms* **29**: 391-400.
- 514 Tomioka K and Matsumoto A. 2010. A comparative view of insect circadian clock  
515 systems. *Cell Mol. Life Sci.* **67**: 1397-1406.
- 516 Tomioka K and Matsumoto A. 2015. Circadian molecular clockworks in non-  
517 model insects. *Current Opinion in Insect Science; Insect genomics \* Development*  
518 *and regulation* **7**: 58-64.
- 519 Trapnell C, Roberts A, Goff L, Pertea G, Kim D, Kelley DR, Pimentel H, Salzberg SL,  
520 Rinn JL, Pachter L. 2012. Differential gene and transcript expression analysis of  
521 RNA-seq experiments with TopHat and Cufflinks. *Nat. Protoc.* **7**: 562-578.
- 522 Ueda HR, Matsumoto A, Kawamura M, Iino M, Tanimura T, Hashimoto S. 2002.  
523 Genome-wide Transcriptional Orchestration of Circadian Rhythms in *Drosophila*.  
524 *J. Biol. Chem.* **277**: 14048-14052.
- 525 Velarde RA, Sauer CD, O. Walden KK, Fahrbach SE, Robertson HM. 2005.  
526 Pteropsin: A vertebrate-like non-visual opsin expressed in the honey bee brain.  
527 *Insect Biochem. Mol. Biol.* **35**: 1367-1377.
- 528 Werren JH, Richards S, Desjardins CA, Niehuis O, Gadau J, Colbourne JK, Nasonia  
529 Genome Working Group, Werren JH, Richards S, Desjardins CA, et al. 2010.



- 530 Functional and evolutionary insights from the genomes of three parasitoid  
531 *Nasonia* species. *Science* **327**: 343-348.
- 532 Woelfle MA and Johnson CH. 2006. No promoter left behind: global circadian  
533 gene expression in cyanobacteria. *J. Biol. Rhythms* **21**: 419-431.
- 534 Yan S, Zhu J, Zhu W, Zhang X, Li Z, Liu X, Zhang Q. 2014. The expression of three  
535 opsin genes from the compound eye of *Helicoverpa armigera* (Lepidoptera:  
536 Noctuidae) is regulated by a circadian clock, light conditions and nutritional  
537 status. *PLoS One* **9**: e111683.
- 538 Yu W and Hardin PE. 2006. Circadian oscillators of *Drosophila* and mammals. *J.*  
539 *Cell. Sci.* **119**: 4793-4795.
- 540 Yuan Q, Metterville D, Briscoe AD, Reppert SM. 2007. Insect Cryptochromes:  
541 Gene Duplication and Loss Define Diverse Ways to Construct Insect Circadian  
542 Clocks. *Mol. Biol. Evol.* msm011.
- 543 Zhang R, Lahens NF, Ballance HI, Hughes ME, Hogenesch JB. 2014. A circadian  
544 gene expression atlas in mammals: implications for biology and medicine. *Proc.*  
545 *Natl. Acad. Sci. U. S. A.* **111**: 16219-16224.
- 546 Zhu H, Sauman I, Yuan Q, Casselman A, Emery-Le M, Emery P, Reppert SM. 2008.  
547 Cryptochromes define a novel circadian clock mechanism in monarch butterflies  
548 that may underlie sun compass navigation. *PLoS Biol.* **6**: e4.
- 549  
550

### Figure legend

Figure 1. Free-run behavioural rhythm in *Nasonia*. Representative actograms of individual *Nasonia* males in DD (left) and LL (right). Activity counts were sorted into 30 minute bins and plotted in blue. Yellow and grey backgrounds indicate lights on and lights off respectively. Gray and black bars below the actogram indicate the 12 hr subjective day and night.

Figure 2. Circadian transcriptional rhythms. **(A)** Heatmap of median-normalised expression of rhythmic ( $q < 0.1$ ) transcripts in both constant darkness and constant light. **(B)** Histograms and heatmap of phases of rhythmic transcripts ( $q < 0.1$  in both conditions), showing bimodal phase distribution and overlap between the two conditions.

Figure 3. Enrichment of GO terms among cycling transcripts. **(A)** Bar plot of 10 top overrepresented GO terms (by gene proportion) for both DD and LL rhythmic genes. **(B)** Euler diagram showing the overlap of overrepresented terms in DD (blue) and LL (red).

Figure 4. Normalised expression of clusters with significant ( $q < 0.01$ ) overrepresentations of rhythmic genes. Each transcript profile in each cluster is coloured by that gene's membership of the cluster.

Figure 5. Comparison of the DD and LL transcriptomes. **(A)** FPKM ( $\log_2$ ) expression of transcripts in DD (x axis) and LL (y axis), showing genes classified

(> 1.5 median fold change) as differentially expressed up in DD (blue) and up in LL (red). **(B)** Selected overrepresented ( $q < 0.01$ ) GO terms for genes more highly expressed in DD. **(C)** Heatmap showing median-normalised expression for differentially expressed transcripts, in DD (left) and in LL (right), sorted by fold change.

Figure 1

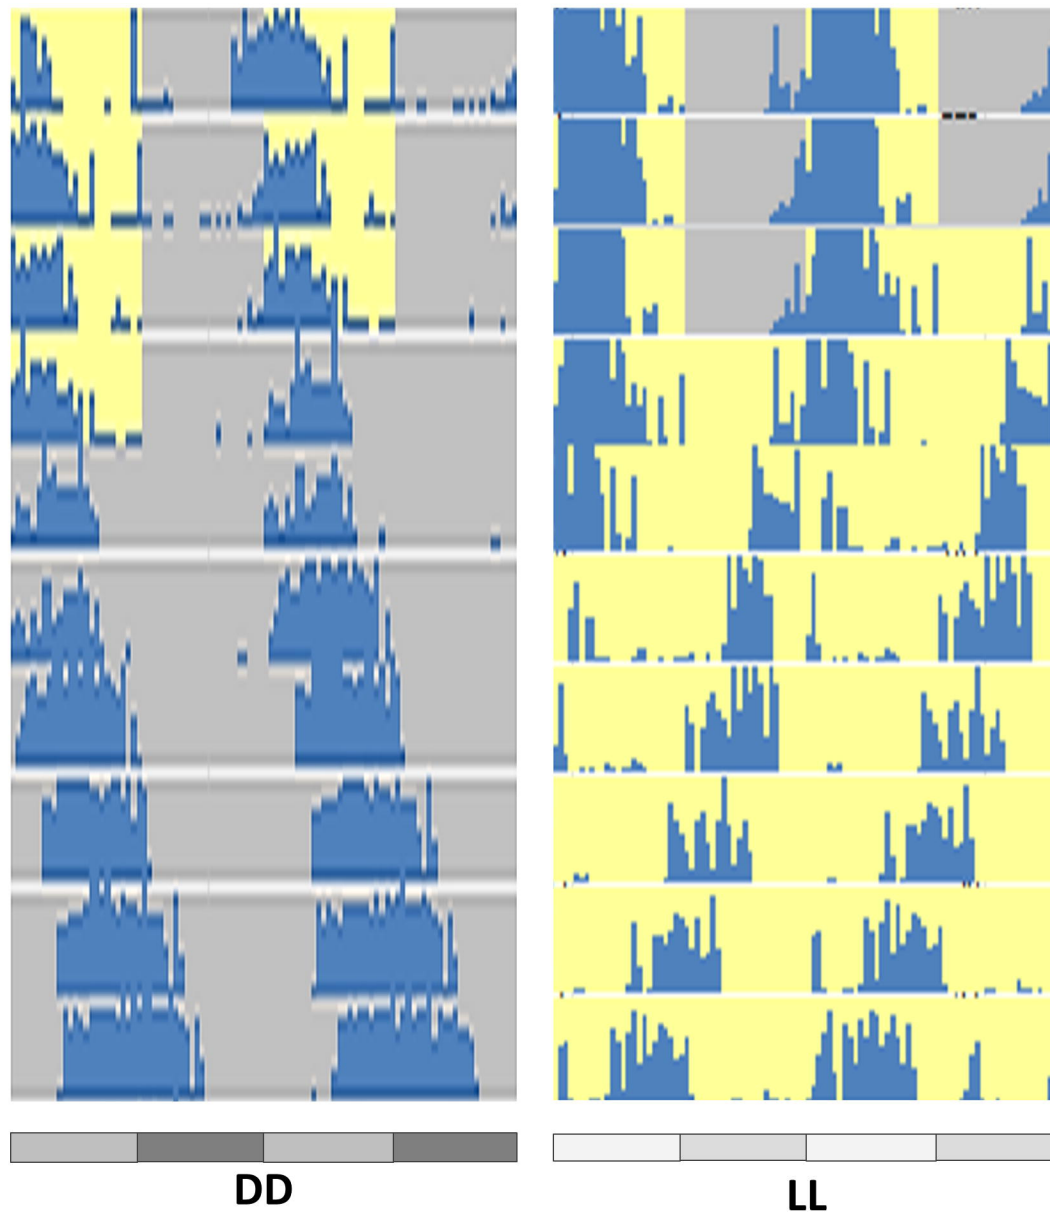

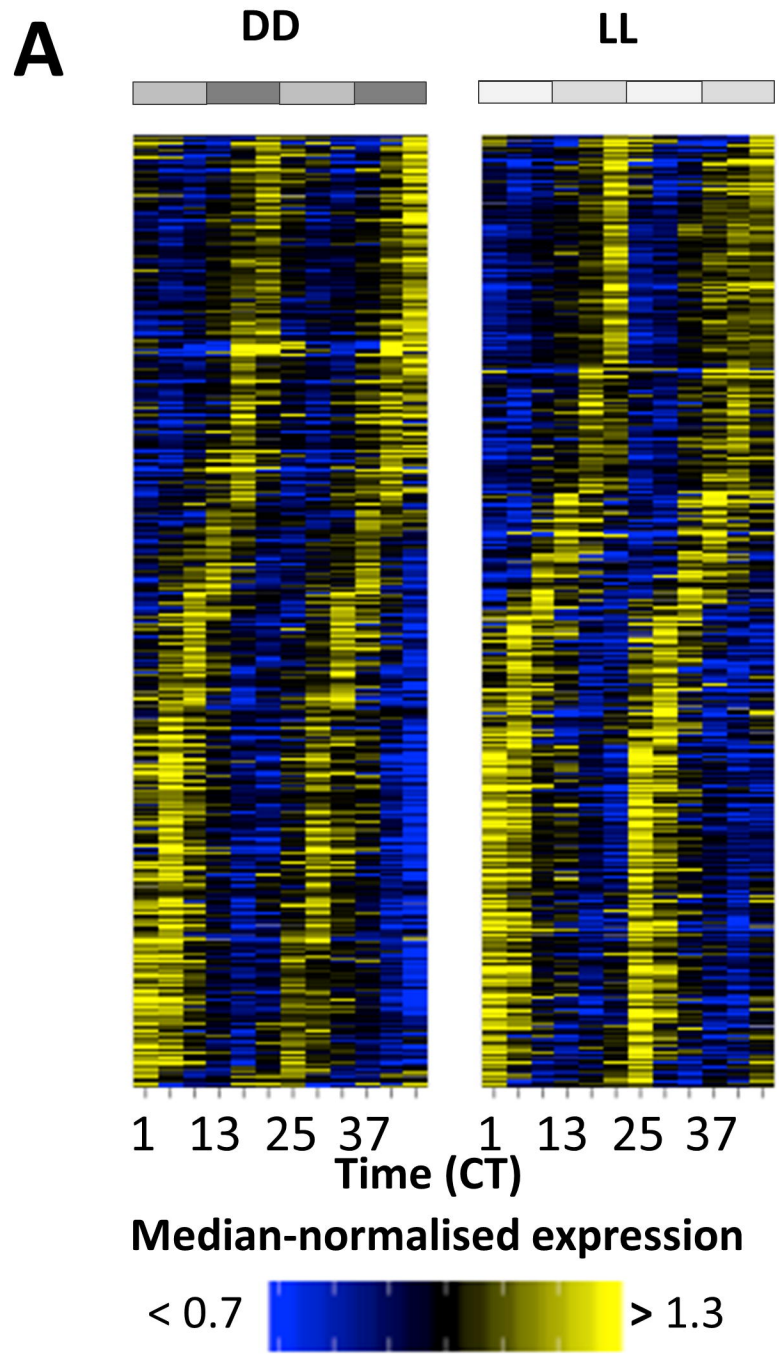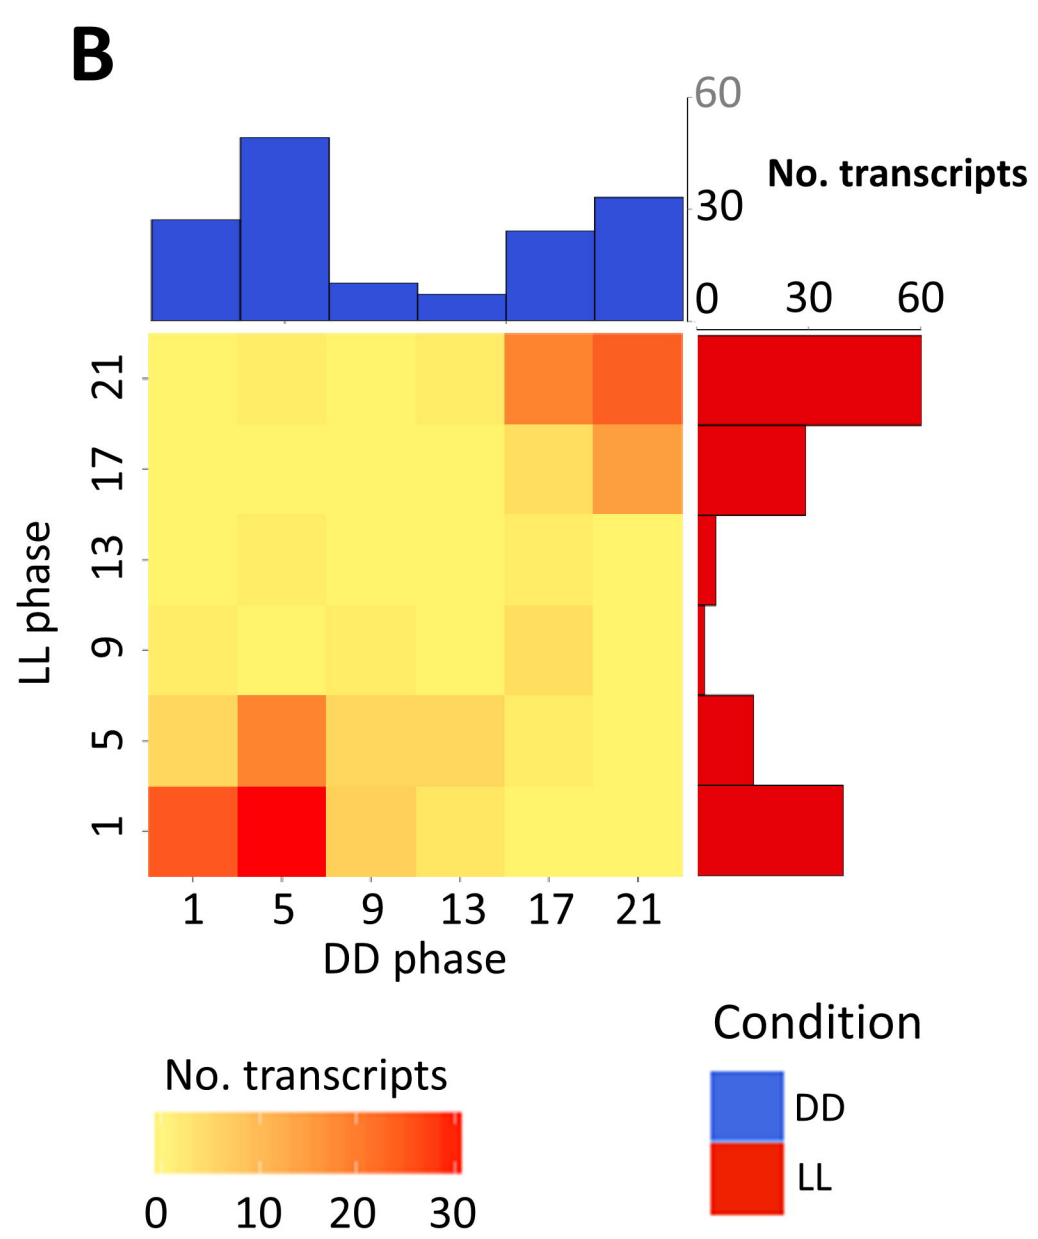

**Figure 2**

Figure 3

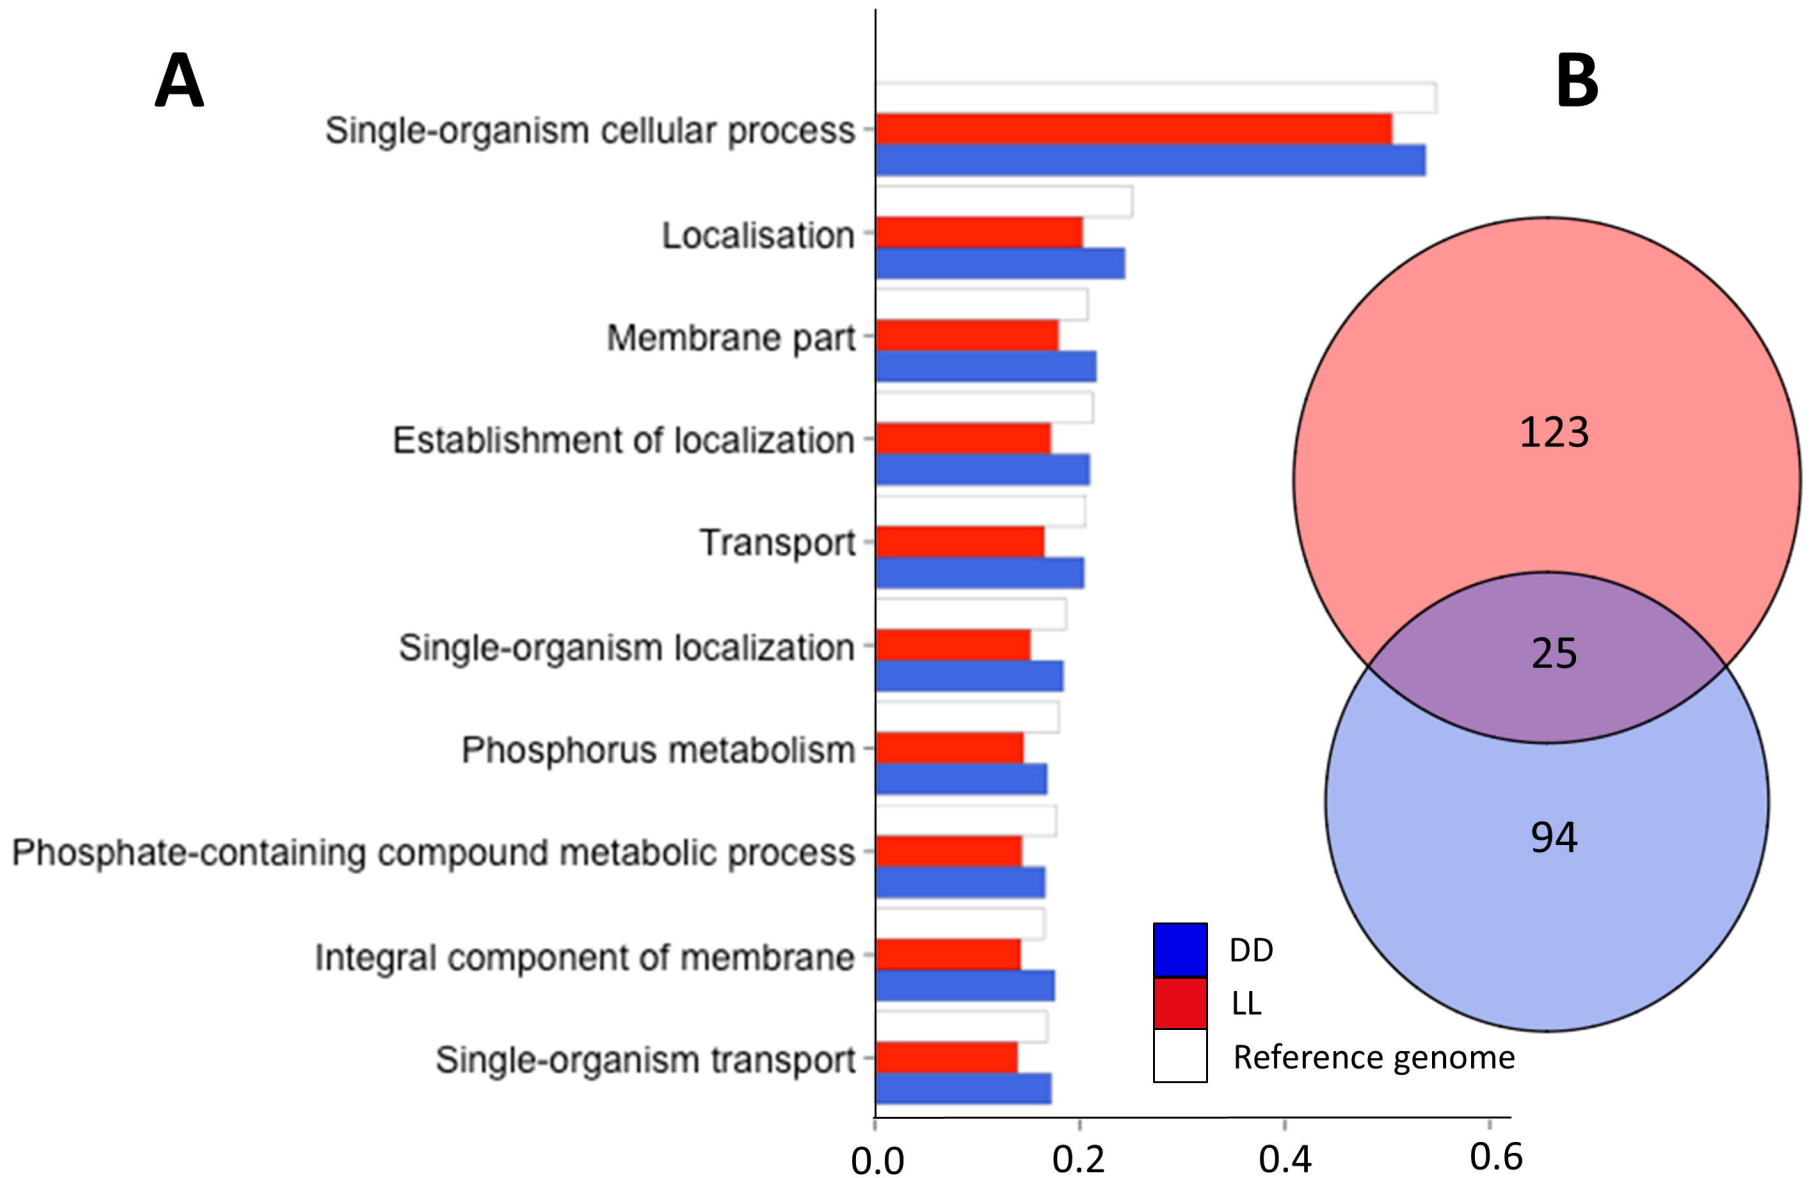



Figure 4

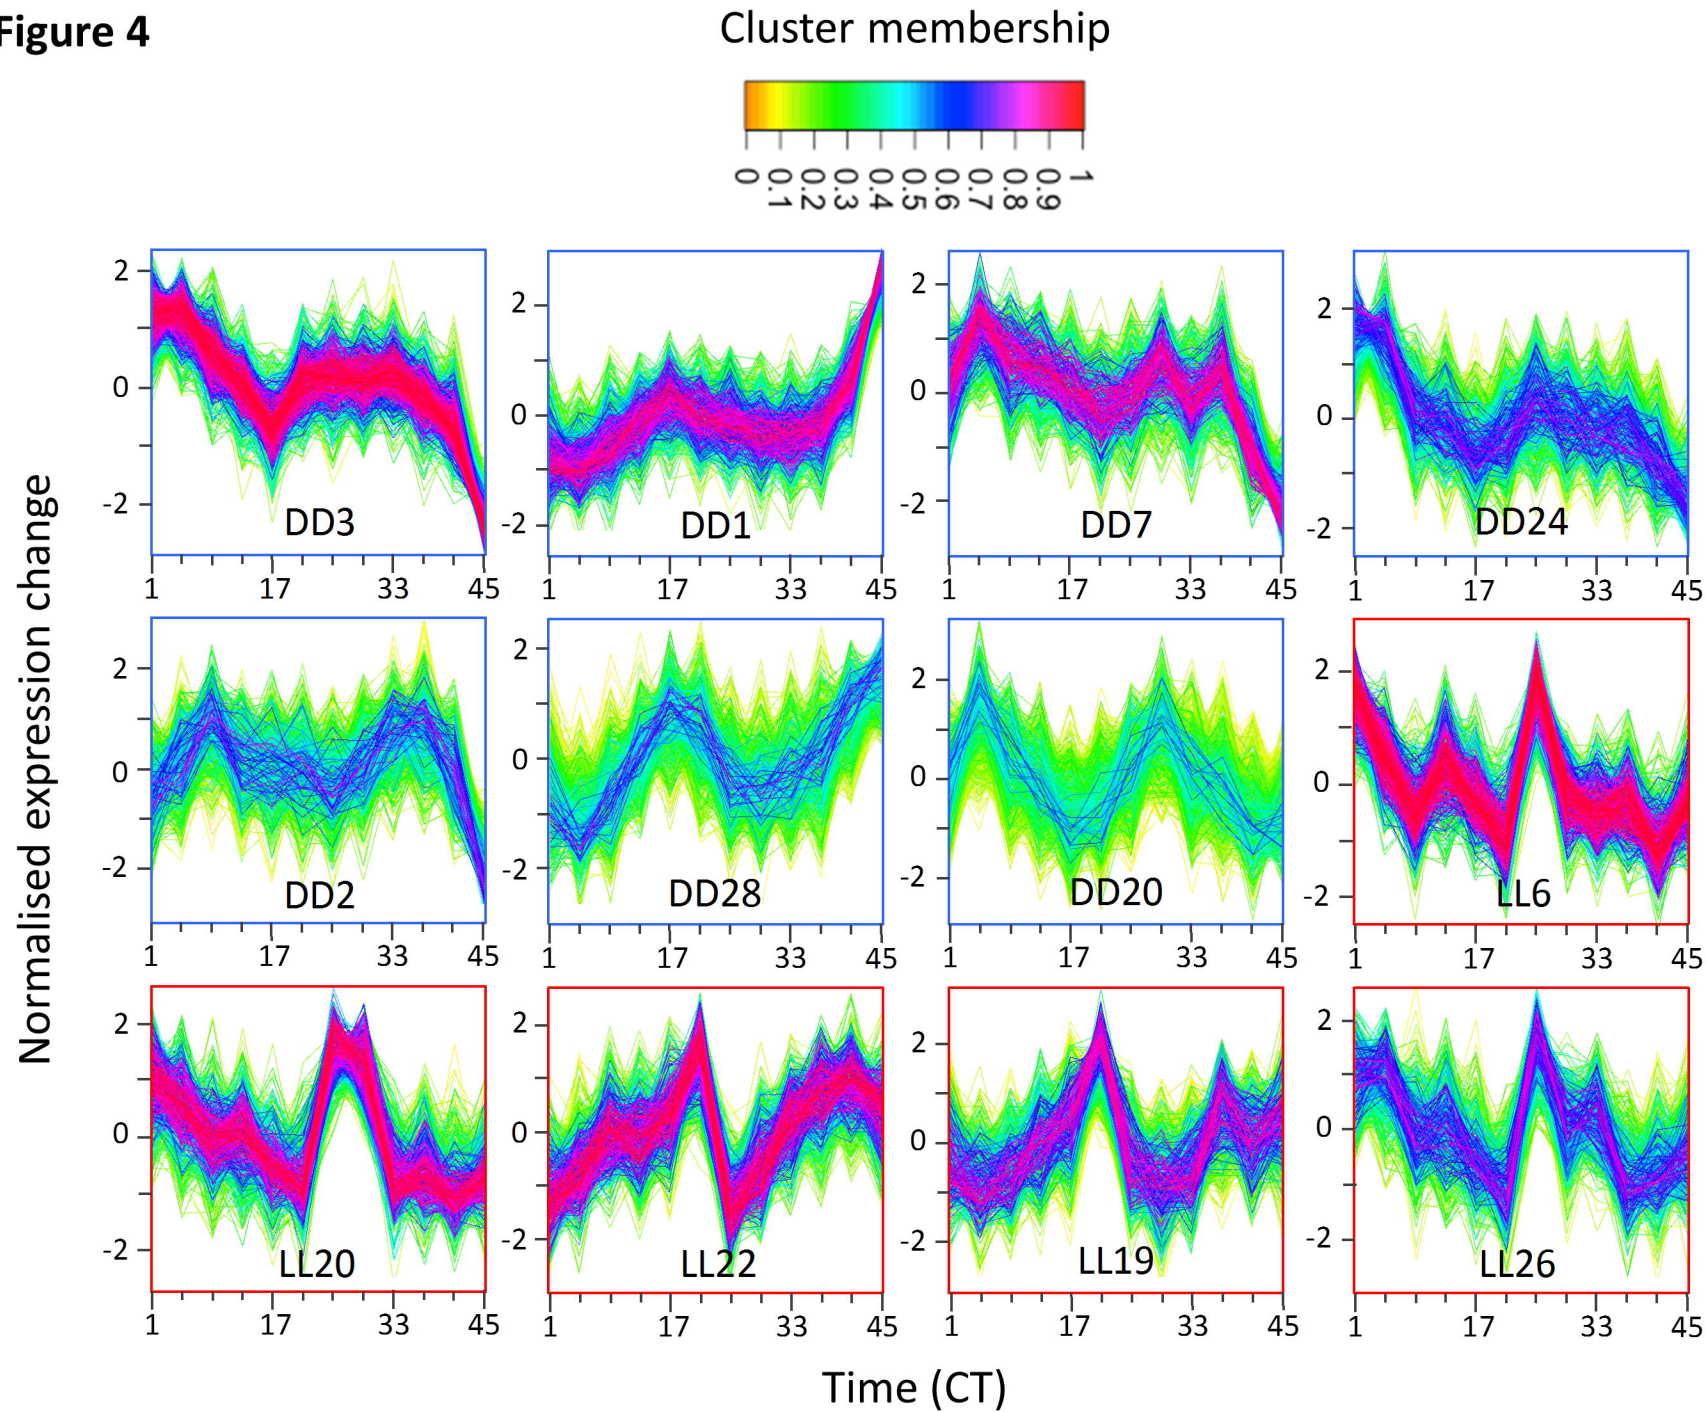

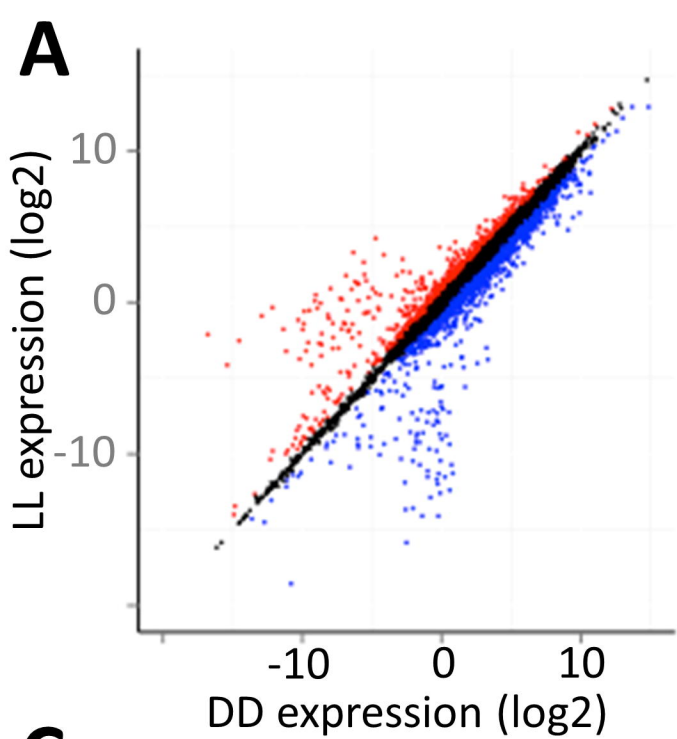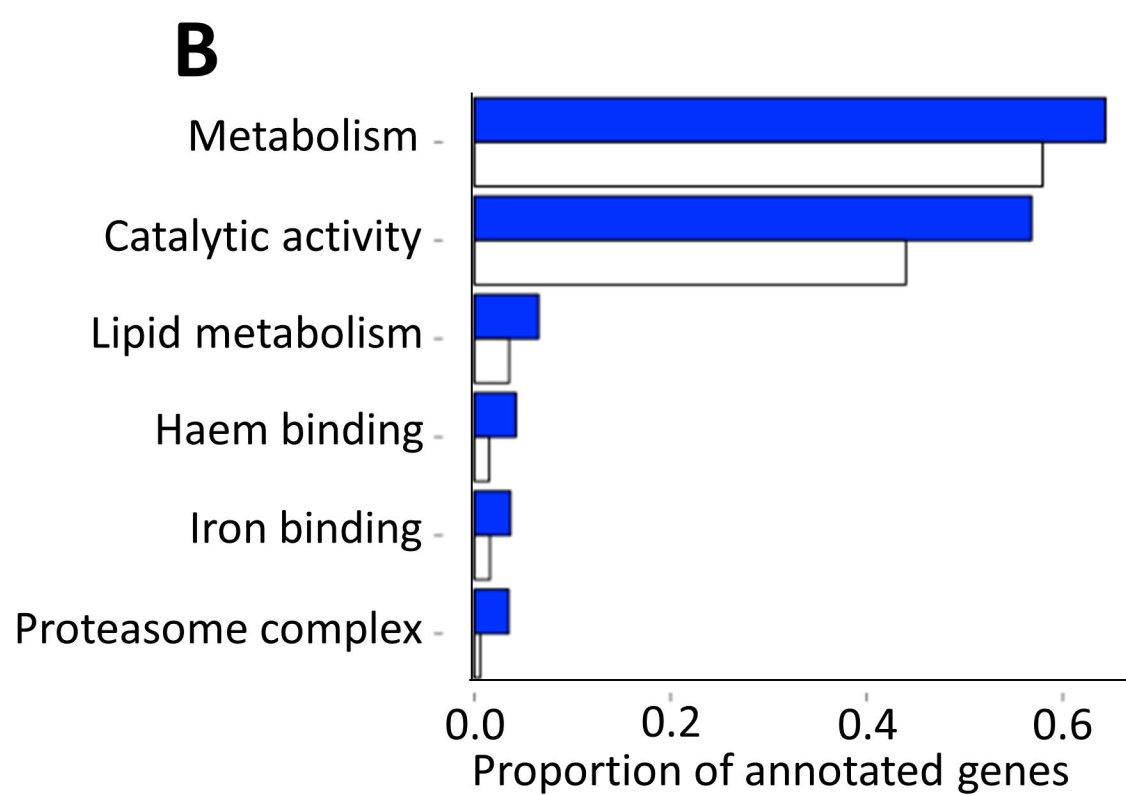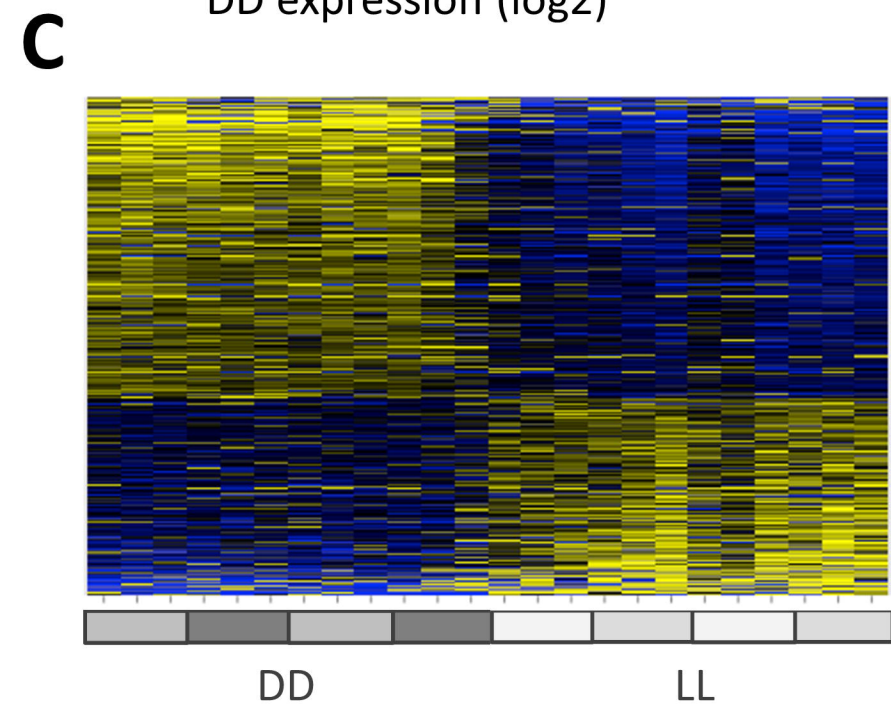

**Figure 5**
